# Supplementary material
Source: MDPI journal article supplement (https://www.mdpi.com/2072-4292/3/2/319)
Supplement: s1 [file s1]

**Electronic Supplementary Information (ESI)**

*Automated detection trial, Briton Ferry (South Wales, UK) (51°63′40.6″N, 03°8′29.25″W)*

Close matching of algorithm output and Phase 1 survey A and B shapefiles can be seen in Figure S1. Indeed, the algorithm has provided results above and beyond those obtained from Phase 1 habitat survey. Several areas not covered by the field survey data, to the centre and west of the image (River Neath) are highlighted as subject to Japanese Knotweed *s.l.* taxa invasion. Detection of these taxa in these locations conforms with literature descriptions of dispersal patterns, with areas nearest to communications routes containing greater densities of Japanese Knotweed *s.l.* taxa [14,24-26,46,47]. Again, the algorithm provides additional management shapefiles, not provided by specialist field survey.

**Figure S1.** Algorithm automated detection trial, Briton Ferry (South Wales, UK) (51°63′40.6″N, 03°8′29.25″W). Please refer to title and legend for further information.


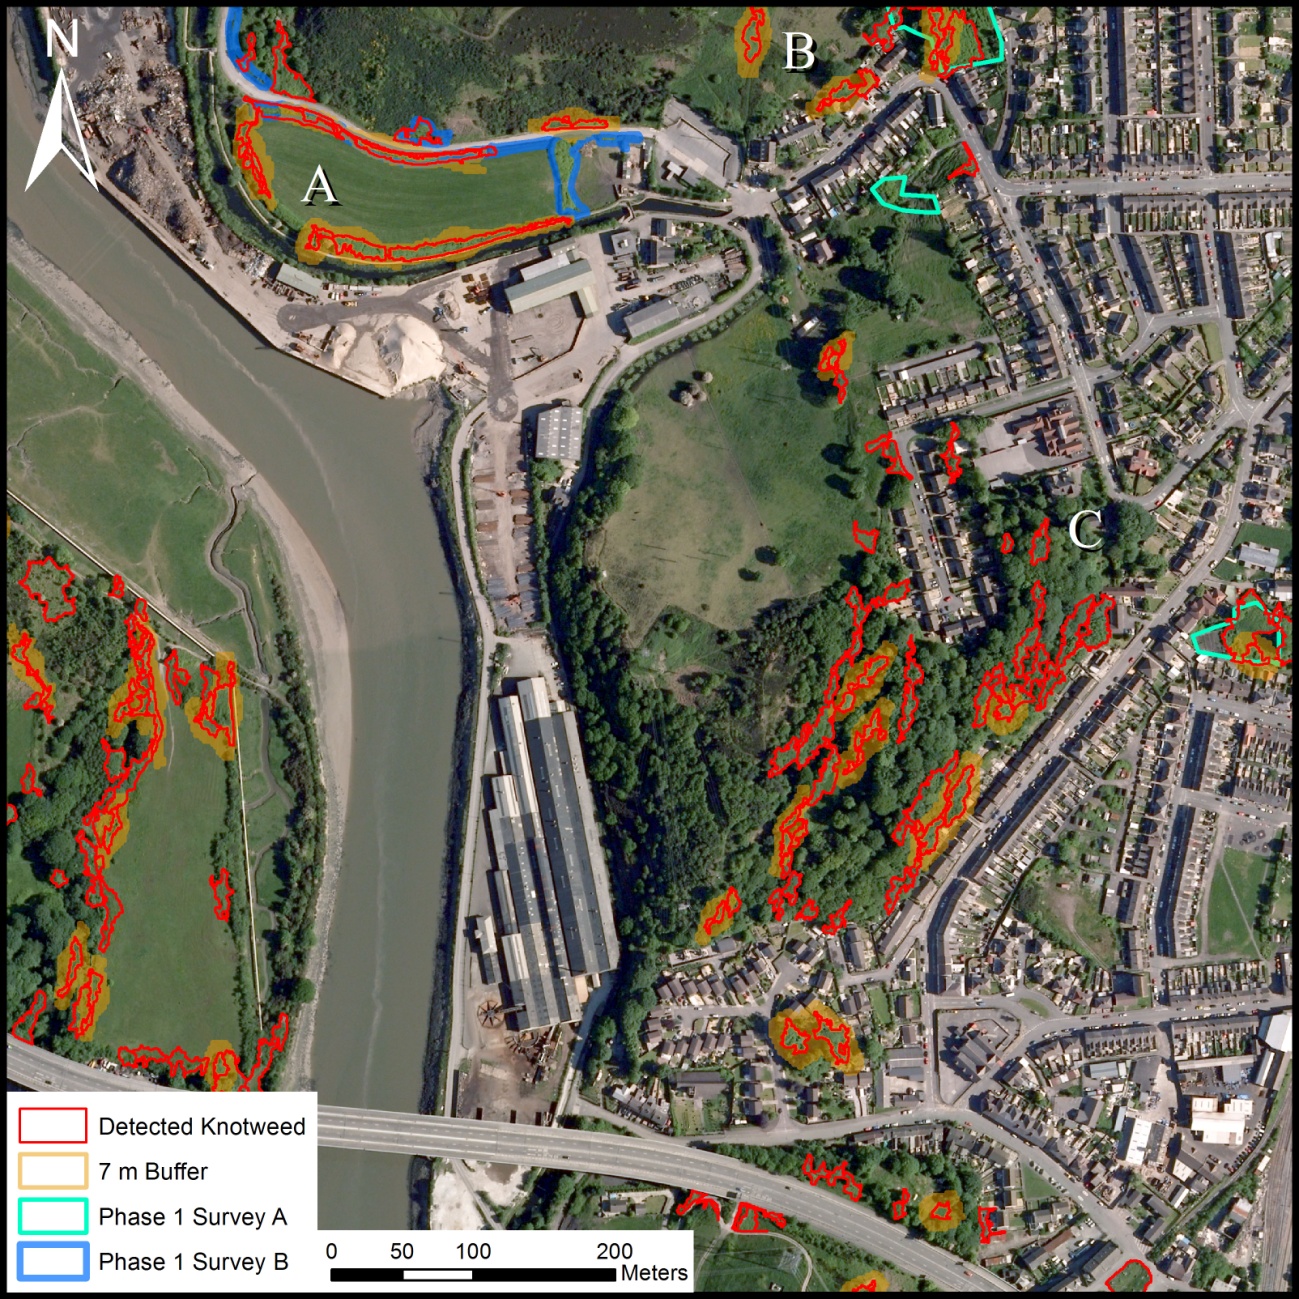


*Point A* (Figure S1) highlights close matching of algorithm output and Phase 1 survey B shapefiles. However, one area not detected, but shown in the field survey data can be seen to the east of the image. The algorithm detected further stands of Japanese Knotweed *s.l.* taxa to the south of the specialist field survey shapefile.

*Point B* (Figure S1) shows close matching of algorithm output and Phase 1 survey A shapefiles. However, one area not detected, but shown in the field survey data can be seen. The algorithm detected further stands of Japanese Knotweed *s.l.* taxa to the east of the specialist field survey shapefiles.

*Point C* (Figure S1) shows close matching of algorithm output and Phase 1 survey A shapefiles. Further Japanese Knotweed *s.l.* taxa stands have also been detected to the east of the Phase 1 survey A shapefile.
